# Supplementary material for: Rapid screening of the antithrombotic active components of Agrimonia pilosa Ledeb with thrombin binding affinity ultrafiltration mass spectroscopy
Source: Royal Society of Chemistry journal article supplement (doi:10.1039/d4ay01909a), 2025-01-01
Supplement: d4ay01909a1.pdf [file d4ay01909a1.pdf]

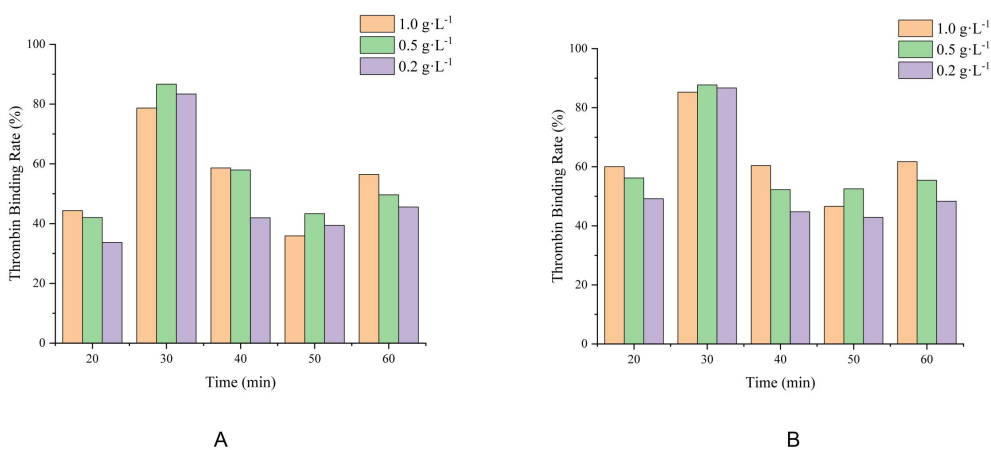

Figure S1 Thrombin inhibition rate at different incubation times of ethyl acetate (A) and n-butanol (B) part of *A. pilosa*.

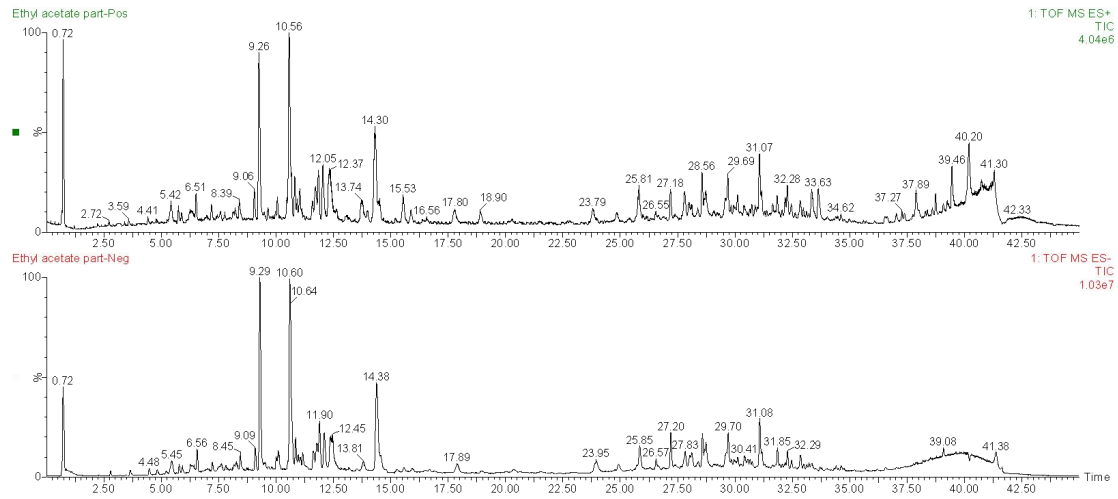

Figure S2 Total ion flow diagram of the ethyl acetate parts of *A. pilosa*

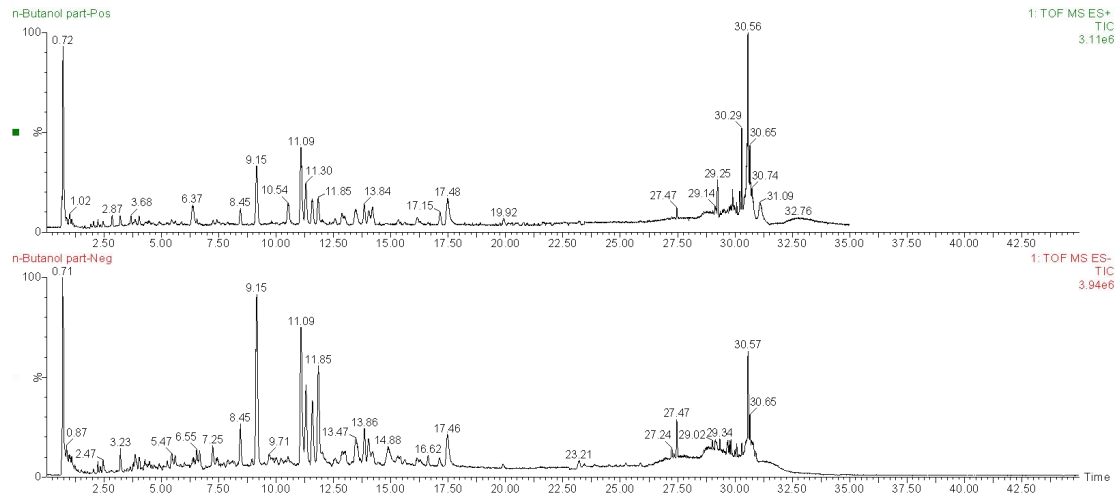

Figure S3 Total ion flow diagram of the n-butanol parts of *A. pilosa*

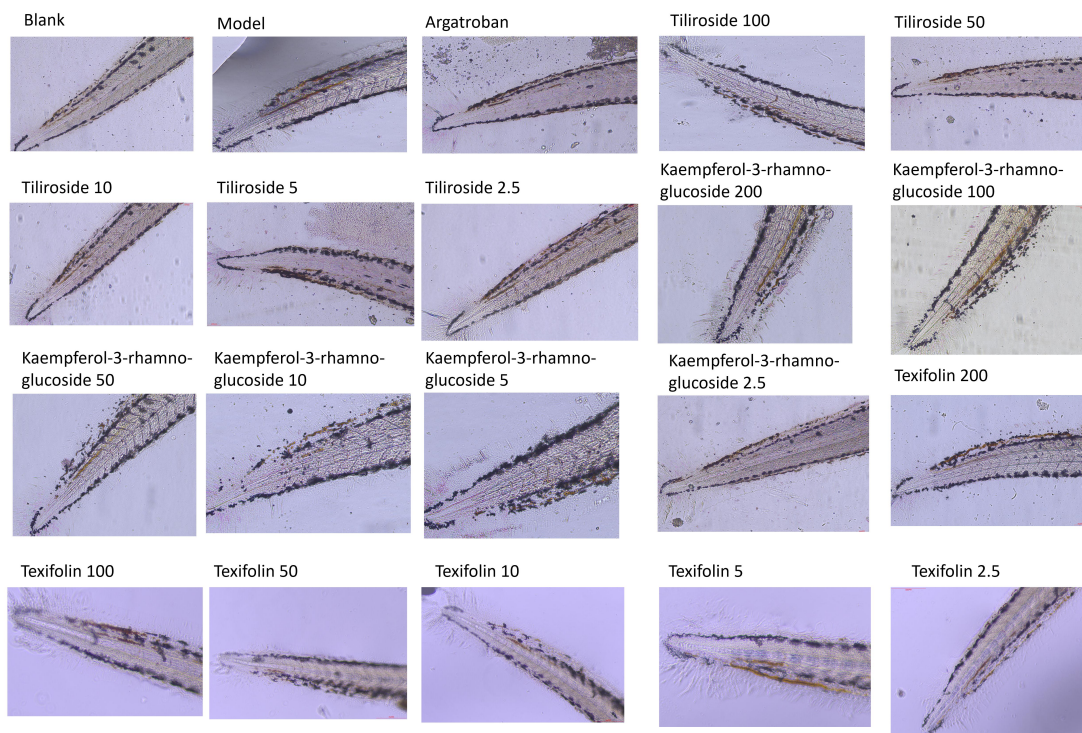

Figure S4 Tail vein thrombosis in Zebrafish under the influence of various compounds ( $\mu\text{g}/\text{mL}$ )

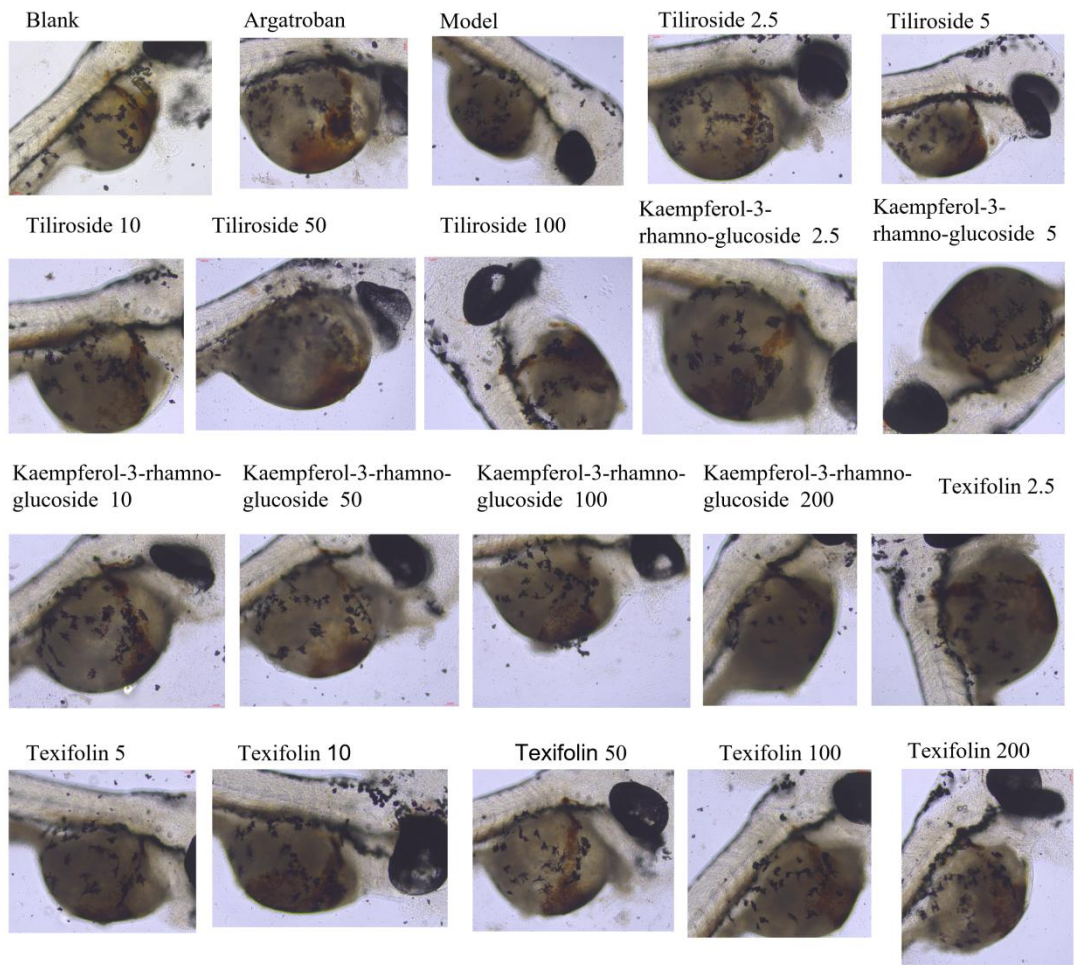

Figure S5 The intensity of red blood cell staining in the zebrafish heart ( $\mu\text{g/mL}$ )
